# Supplementary material for: Integrated analysis of mRNA and protein expression profiling in tubal endometriosis
Source: PubMed Central journal article supplement (PMC7159149; doi:10.1530/rep-19-0587), 2020-03-02

**Fig S1**

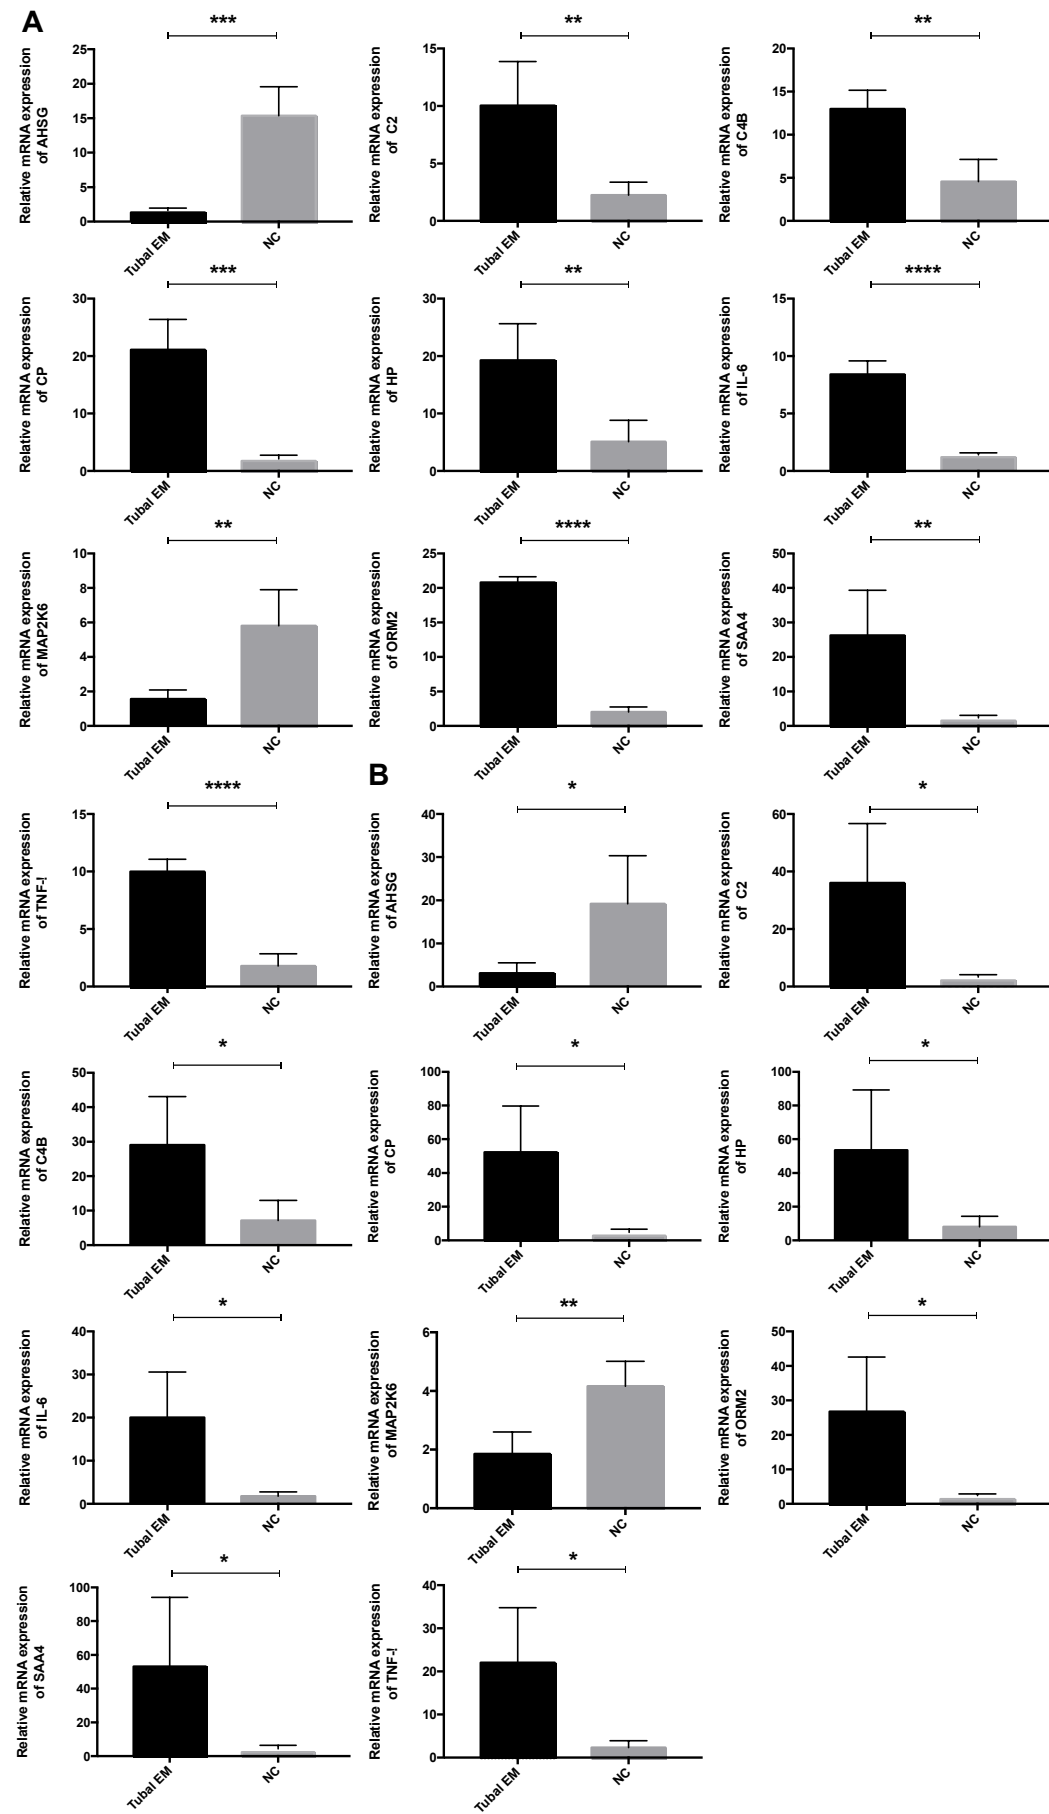

Supplement: supplementary_figure_1.pdf [file supplementary_figure_1.pdf]
