# Supplementary material for: Integrated analysis of mRNA and protein expression profiling in tubal endometriosis
Source: PubMed Central journal article supplement (PMC7159149; doi:10.1530/rep-19-0587), 2020-03-02
Supplement: supplementary_table_1.pdf [file supplementary_table_1.pdf]

Table S1. The RINs for the samples and the concentration of RNA used for the hybridization.

| <b>Sample name</b> | <b>Concentration<br/>(ng/ul)</b> | <b>Volume<br/>(ul)</b> | <b>Total<br/>(ug)</b> | <b>A260/A280</b> | <b>2100 Result<br/>RIN*</b> | <b>28S/18S</b> |
|--------------------|----------------------------------|------------------------|-----------------------|------------------|-----------------------------|----------------|
| N302837-TEM        | 590.8                            | 55                     | 32.49                 | 2.13             | 7.0                         | 1.9            |
| N129922-TEM        | 583.4                            | 70                     | 40.84                 | 2.03             | 7.6                         | 1.0            |
| N305896-TEM        | 569.1                            | 55                     | 31.30                 | 2.16             | 8.5                         | 1.7            |
| N308632-TEM        | 651.5                            | 55                     | 35.83                 | 2.17             | 8.8                         | 1.4            |
| N305044-NC         | 506.3                            | 55                     | 27.85                 | 2.11             | 8.2                         | 1.9            |
| N306224-NC         | 542.3                            | 55                     | 29.83                 | 2.09             | 8.5                         | 1.7            |
| N303534-NC         | 533.2                            | 55                     | 29.33                 | 2.15             | 8.6                         | 1.7            |
| N306515-NC         | 574.1                            | 55                     | 31.58                 | 2.13             | 9.3                         | 1.8            |

\*: RNA Integrity Number. From 0-10, the higher the score, the better the RNA integrity.
