# Supplementary material for: Integrated analysis of mRNA and protein expression profiling in tubal endometriosis
Source: PubMed Central journal article supplement (PMC7159149; doi:10.1530/rep-19-0587), 2020-03-02
Supplement: supplementary_table_2.pdf [file supplementary_table_2.pdf]

Table S2. Primer sequence information for RT-qPCR used in this study.

| <b>Symbol</b>  | <b>Gene name</b>                          | <b>Accession number</b> | <b>Forward and reverse primer sequence [5'-3']</b>         | <b>Production size</b> |
|----------------|-------------------------------------------|-------------------------|------------------------------------------------------------|------------------------|
| <i>GAPDH</i>   | Glyceraldehyde                            | NM_002046.5             | F: TCCAAAATCAAGTGGGGCGA<br>R: TGATGACCCTTTTGCTCCC          | 115 bp                 |
| <i>ACTB</i>    | β-actin                                   | NM_001101.3             | F: CTTCCAGCCTTCCTTCCTGG<br>R: CTGTGTTGGCGTACAGGTCT         | 110 bp                 |
| <i>18s RNA</i> | 18s RNA                                   | M10098.1                | F: GGAGCCTGCGGCTTAATTTG<br>R: CCACCCACGGAATCGAGAAA         | 100 bp                 |
| <i>AHSG</i>    | alpha 2-HS glycoprotein                   | NM_001354571.2          | F: CCCAGGGCTGATTTATAGACAA<br>R: GTTCAAGGTGTGTTTGTATCCC     | 118bp                  |
| <i>C2</i>      | Complement C2                             | NM_000063.6             | F: CTCCCTCCTGCCCTCAGAACG<br>R: GCCACTGTCCGCTGCTCTTG        | 150bp                  |
| <i>C4B</i>     | Complement C4B                            | NM_001002029.4          | F: ACACTGCCTCCCGAGACCAAG<br>R: CGTGACAACCAAGCCGCATAGG      | 110bp                  |
| <i>CP</i>      | Ceruloplasmin                             | NM_000096.4             | F: GGGCCAATGAAAATATGCAAGA<br>R: CTGATCAGGTGCAGTTGTAAAC     | 156bp                  |
| <i>HP</i>      | Haptoglobin                               | NM_005143.5             | F:<br>AGGCATTATGAAGGCAGCACAGTC<br>R: CGCATCGCCATAGCAGGTGTC | 135bp                  |
| <i>IL-6</i>    | Interleukin 6                             | NM_000600.5             | F: CACTGGTCTTTTGGAGTTTGAG<br>R: GGACTTTTGTACTCATCTGCAC     | 101bp                  |
| <i>MAP2K6</i>  | Mitogen-activated protein kinase kinase 6 | NM_002758.4             | F: CAAGGCTTGCATTTCTATTGGA<br>R: CAAATCCATCAGTAGCCGTTTC     | 196bp                  |
| <i>ORM2</i>    | Orosomucoid 2                             | NM_000608.4             | F: GACACGATCTTTCTCAGAGAGT<br>R: CTTGTCAGCATAGAAAGACAGC     | 124bp                  |
| <i>SAA4</i>    | Serum amyloid A4                          | NM_006512.4             | F: GGGTGTCTGGGCTGCTAAACTC<br>R: GCCCATTCCTCAGCTTTCTCG      | 133bp                  |
| <i>TNFA</i>    | Tumor necrosis factor                     | NM_000594.4             | F: CGTGGAGCTGGCCGAGGAG<br>R: GCAGGCAGAAGAGCGTGGTG          | 125bp                  |
