# Supplementary material for: Integrated analysis of mRNA and protein expression profiling in tubal endometriosis
Source: PubMed Central journal article supplement (PMC7159149; doi:10.1530/rep-19-0587), 2020-03-02
Supplement: supplementary_table_3.pdf [file supplementary_table_3.pdf]

Table S3. Details for the annotation used for transcript identifiers.

| Probe Name   | Gene Symbol    | Ensembl         | Accession    | Probe Seq                                                         |
|--------------|----------------|-----------------|--------------|-------------------------------------------------------------------|
| A_23_P38816  | <i>AIBG</i>    | ENST00000598345 | NM_130786    | CCTGGTGGCAGAAAGCTGATGCAGCCGCGGG<br>CCCAGAGGTGCTGTTGGTGTCTCAGAAG   |
| A_23_P117599 | <i>AHSA1</i>   | ENST00000556866 | NM_012111    | ATTAGTGTGAGCCTTGCCAAAGATGAGCCTG<br>ACACAAATCTCGTGGCCTTAATGAAGGAA  |
| A_23_P155509 | <i>AHSG</i>    | ENST00000411641 | NM_001622    | CATGATTGTGTTCTCTGCCTCTGGTTGACCTT<br>ACAAAAACCATTGGAACCTGTGACTTTGA |
| A_23_P205959 | <i>ALDH1A3</i> | ENST00000329841 | NM_000693    | ATATAGACACTAACCTTGATAGTGATACGTT<br>AGAGGGTTCCTATTCTTCCATTGTACGAT  |
| A_32_P148345 | <i>ANXA2</i>   | ENST00000421017 | NM_001002857 | TAAGCCAAAGAAATGTACATTCCAAGCAGTT<br>GGAAGTGAAATCTATGATGTGAAACACTT  |
| A_23_P48217  | <i>APOLD1</i>  | ENST00000326765 | NM_030817    | GAGTGGTTGTAGAAGTCTCCATAAATCAGAC<br>ATGTCAAGCAATCAGCCAACGTGGTGTAT  |
| A_32_P162183 | <i>C2</i>      | ENST00000299367 | NM_000063    | GGTTGACTTGACTCATGCTTGTTTCACTTTCA<br>CATGGAATTTCCAGTTATGAAATTAAT   |
| A_23_P42282  | <i>C4B</i>     | ENST00000463249 | NM_001002029 | GCTTTCGCCTCTTTGAGACCAAGATCACCCA<br>AGTCCTGCACTTCACCAAGGATGTCAAG   |
| A_24_P228130 | <i>CCL3L3</i>  | ENST00000621940 | NM_001001437 | TTCCACAGAATTTTCATAGCTGACTACTTTGAG<br>ACGAGCAGCCAGTGCTCCAAGCCCAGTG |
| A_23_P207564 | <i>CCL4L2</i>  | ENST00000613947 | NM_001291470 | CAGGAAGTCTTCAGGGAAGGTCACCTGAGCC<br>CGGATGCTTCTCCATGAGACACATCTCCT  |
| A_23_P138760 | <i>CLCF1</i>   | ENST00000312438 | NM_013246    | TGGCAATTCTACACAAAAAGAGATGAGATTA<br>ACAGTGCAGGGTTGGGGTCTGCATTGGAG  |
| A_23_P254522 | <i>COL4A4</i>  | ENST00000396625 | NM_000092    | TCCTAAAAGTTCAACCTGTTTCATCTGAACTT<br>GGCCTGAGAACATTTTCTGGGAAGAGGT  |
| A_23_P26021  | <i>COPS2</i>   | ENST00000299259 | NM_004236    | TGCTTTTTTGATCAACTGGTTTGTGTTTTGCTG<br>CTGCATTTATCCCAAGAAAAACAGCTT  |
| A_23_P414793 | <i>CP</i>      | ENST00000463556 | NM_000096    | TCACGGCCATAGCTTCCAATACAAGCACAGG<br>GGAGTTTATAGTTCTGATGTCTTTGACAT  |
| A_23_P7144   | <i>CXCL1</i>   | ENST00000395761 | NM_001511    | CATACTGCCTTGTTTAATGGTAGTTTTACAGT<br>GTTTCTGGCTTAGAACAAAGGGGCTTAA  |
| A_23_P315364 | <i>CXCL2</i>   | ENST00000508487 | NM_002089    | CAATGTGACGGCAGGGAAATGTATGTGTGTC<br>TATTTTGTAAGTGTAAAGATGAATGTCAG  |
| A_23_P108415 | <i>DARS</i>    | ENST00000537273 | NM_001349    | TTGATTTGGAGAAAATTAAGGCTTACATTGAT<br>TCCTCCGCTTTGGAGCCCCCTCCTCATG  |
| A_23_P12405  | <i>ESPN</i>    | ENST00000377828 | NM_031475    | GCCTCATTTCTTATCCCCGCCAAGGGTTTCCT<br>CTCAGTCATTTGTTTACCAGAAACATGA  |
| A_23_P375372 | <i>FGA</i>     | ENST00000403106 | NM_021871    | GGAGAGAGTACCACACAGAAAACTGGTCAC<br>TTCTAAAGGAGATAAAGAGCTCAGGACTG   |
| A_23_P93027  | <i>FGF18</i>   | ENST00000274625 | NM_003862    | GGGTGATAAGGATTTTATTGTTGACTTGAAAC<br>CCCCGATGACAAAAGACTCACGCAAAGG  |
| A_24_P99244  | <i>FGF7</i>    | ENST00000560765 | NM_002009    | TCTACAGATCATGCTTTCACATTATCTGTCTA<br>GTGGGTACTATATCTTTAGCTTGCAATG  |
| A_23_P96568  | <i>FLNA</i>    | ENST00000498491 | NM_001456    | TCCCTCGGGAGAATGGCGTTTACCTGATTGAC<br>GTCAAGTTCAACGGTACCACATCCCTG   |
| A_23_P167349 | <i>GC</i>      | ENST00000503472 | NM_000583    | CTTTACTGTGATTTCAGAGATTGATGCTGAATT<br>GAAGAATATCCTGTAGTCTGAAGCATG  |
| A_24_P140608 | <i>HBEGF</i>   | ENST00000230990 | NM_001945    | CCCATCTGTAGTAATTTATTGTCTGTCTACAT                                  |

|              |                 |                 |              |                                                                   |
|--------------|-----------------|-----------------|--------------|-------------------------------------------------------------------|
|              |                 |                 |              | TTCTGCAGATCTTCCGTGGTCAGAGTGC                                      |
| A_24_P311926 | <i>HLA-G</i>    | ENST00000428701 | NM_002127    | TTCCTGTTCCAGAAAAGGGGCTGGGATGTCT<br>CCGTCTCTGTCTCAAATTTGTGGTCCACT  |
| A_23_P206760 | <i>HP</i>       | ENST00000566821 | NM_005143    | GATAAGATGTGGTTTGAAGCTGATGGGTGCC<br>AGCCCTGCATTGCTGAGTCAATCAATAAA  |
| A_23_P71037  | <i>IL6</i>      | ENST00000485300 | NM_000600    | ATTGTTGTTGTTAATGGGCATTCTTCTTCTG<br>GTCAGAAACCTGTCCACTGGGCACAGAA   |
| A_23_P5131   | <i>ISYNA1</i>   | ENST00000577820 | NM_016368    | TACCCTATGTTGAACAAGAAAGGACCGGTAC<br>CCGCTGCCACCAATGGCTGCACCGGTGAT  |
| A_24_P416489 | <i>MAP2K6</i>   | ENST00000590474 | U39657       | TGGGTAAATATACCCACAGGTTCTATGATTTG<br>TAGCTCTAGGTTTCTTGATGATCAAGGA  |
| A_23_P207699 | <i>MAPT</i>     | ENST00000621329 | NM_016835    | ACCAGTCTCTTTGTAAGGACTTGTGCCTCTT<br>GGGAGACGTCCACCCGTTTCCAAGCCTG   |
| A_23_P52761  | <i>MMP7</i>     | ENST00000260227 | NM_002423    | TTGGGTATGGGACATTCTCTGATCCTAATGC<br>AGTGATGTATCCAACCTATGAAATGGA    |
| A_24_P279797 | <i>MRI1</i>     | ENST00000319545 | NM_001031727 | TTTTATGTGTAAGATCATAAAACGTTGTAAG<br>TTTTCTAAAACACATAAGCTCTCAATAA   |
| A_23_P77529  | <i>MSLN</i>     | ENST00000545450 | NM_005823    | GTGGAATGTGACGTCCCTGGAGACCCTGAAG<br>GCTTTGCTTGAAGTCGACAAAGGGCACGA  |
| A_24_P408772 | <i>NAMPT</i>    | ENST00000354289 | NM_005746    | ACAGGCACCACTAATAATCAGACCTGATTCT<br>GGAAACCCTCTTGACACTGTGTTAAAGGT  |
| A_23_P127584 | <i>NNMT</i>     | ENST00000299964 | NM_006169    | CTGCTGTGAAAGAGGCTGGCTACACAATCGA<br>ATGGTTTGAGGTGATCTCGCAAAGTTATT  |
| A_24_P252364 | <i>NRCAM</i>    | ENST00000351718 | NM_001037132 | GTGGTTTTAAAAGTTCCTCTCTCTTTTGTAAAT<br>TATGTTCCCAATTGAGTGTGAATGTCC  |
| A_23_P9485   | <i>ORM2</i>     | ENST00000431067 | NM_000608    | GTTTGGTTCCTACCTGGACGATGAGAAGAAC<br>TGGGGGCTGTCTTCTATGCTGACAAGCC   |
| A_23_P257129 | <i>PAEP</i>     | ENST00000371768 | NM_002571    | TACGGTGGCGAACGAGGCCACGCTGCTCGAT<br>ACTGACTACGACAATTTCTGTTTCTCTG   |
| A_23_P74001  | <i>S100A12</i>  | ENST00000368737 | NM_005621    | TGAAGGCTTTTTACCCAGCAATGTCCTCAATG<br>AGGGTCTTTTCTTCCCTCACAAAACC    |
| A_23_P23048  | <i>S100A9</i>   | ENST00000368738 | NM_002965    | GAGCTGGTGCGAAAAGATCTGCAAAATTTTC<br>TCAAGAAGGAGATAAGAATGAAAAGGTC   |
| A_23_P87238  | <i>SAA4</i>     | ENST00000615694 | NM_006512    | GATATCCAATCACAAAATTCAAAACAGATAT<br>CTCTATGCTCGGGGAAACTATGATGCTGC  |
| A_23_P16944  | <i>SDC1</i>     | ENST00000381150 | NM_001006946 | ACCCTGGGCCCTGGGCTGGAATCAGGAATAT<br>TTTCCAAAAGAGTGATAGTCTTTTGCTTTT |
| A_23_P134176 | <i>SOD2</i>     | ENST00000541573 | NM_001024465 | TTGATGTGTGGGAGCACGCTTACTACCTTCAG<br>TATAAAAATGTCAGGCCTGATTATCTAA  |
| A_23_P107206 | <i>STAT3</i>    | ENST00000404395 | NM_213662    | TCATCATGGGCTATAAGATCATGGATGCTAC<br>CAATATCCTGGTGTCTCCACTGGTCTATC  |
| A_23_P70168  | <i>TARS</i>     | ENST00000502553 | NM_152295    | CTGCAGGCGTAACTATTTTTGACCTAGTCAGT<br>TTTTAAACAATGTGCATTTGAAGGAGTT  |
| A_24_P142118 | <i>THBS1</i>    | ENST00000260356 | NM_003246    | AATAAGCTGCTCTGCCCTTGTGCTCAGAGTG<br>GATGTTATGGGATTCTTTTTTCTCTGT    |
| A_23_P376488 | <i>TNF</i>      | ENST00000376122 | NM_000594    | GGGGTATCCTGGGGGACCAATGTAGGAGCT<br>GCCTTGGCTCAGACATGTTTCCGTGAAA    |
| A_24_P152398 | <i>TP53AIP1</i> | ENST00000621818 | NM_001195195 | ACACACACACCTGGCTGGGTTTCAGATCCCTT<br>AGTTTTGGGTGCCCAAGTTCACGGAGGG  |
| A_23_P26954  | <i>VAT1</i>     | ENST00000592388 | NM_006373    | TGCCCAACCATTGCAATGGGAGGTGGAGGG                                    |

---

|              |               |                 |           |                                                                                                   |
|--------------|---------------|-----------------|-----------|---------------------------------------------------------------------------------------------------|
| A_23_P102113 | <i>WNT10A</i> | ENST00000258411 | NM_025216 | ACAGGCTCAGCCTCCTCATTGTCTAAATG<br>AACAAATATTTATTTGCACTCTCTTTGCGGC<br>ACTCTGGGGGCGGTGGGGTGC GTGGGGG |
|--------------|---------------|-----------------|-----------|---------------------------------------------------------------------------------------------------|

---
