# Supplementary material for: Integrated analysis of mRNA and protein expression profiling in tubal endometriosis
Source: PubMed Central journal article supplement (PMC7159149; doi:10.1530/rep-19-0587), 2020-03-02
Supplement: supplementary_table_4.pdf [file supplementary_table_4.pdf]

Table S4. 50 Differentially expressed genes microarray information

| Gene            | FDR-adjusted p-value | Fold Change relative to control | S129922_T EM | S302873_T EM | S305896_T EM | S308632_T EM | S303534_NC  | S305044_NC | S306224_NC | S306515_NC |
|-----------------|----------------------|---------------------------------|--------------|--------------|--------------|--------------|-------------|------------|------------|------------|
| <i>AIBG</i>     | 0.00944872           | 2.41096872                      | 9.08865384   | 10.0553601   | 9.10764472   | 8.99075892   | 8.10122992  | 8.3054691  | 7.8861874  | 7.75934741 |
| <i>AHSA1</i>    | 0.0024016            | 0.47443258                      | 7.62266      | 7.38636      | 7.1889       | 7.19354      | 8.60239     | 8.61946    | 8.53263    | 7.93988    |
| <i>AHSG</i>     | 0.00326809           | 0.34208826                      | 5.31895219   | 4.77507753   | 5.79579407   | 5.17588432   | 6.66301857  | 6.96121131 | 6.87621894 | 6.75549738 |
| <i>ALDH1A3</i>  | 0.00183073           | 2.91633701                      | 9.47477586   | 10.0790383   | 9.25120426   | 9.63248156   | 7.15651354  | 8.84120876 | 7.90371804 | 8.0561288  |
| <i>ANXA2</i>    | 0.00987526           | 0.44494842                      | 8.19742      | 7.55716      | 8.13764      | 8.73795      | 8.91446     | 9.5387     | 9.11079    | 9.73938    |
| <i>APOLD1</i>   | 0.00401784           | 7.20598314                      | 10.7641727   | 11.8680319   | 10.2376323   | 9.51781912   | 6.73544791  | 8.01470703 | 9.13175638 | 7.50913972 |
| <i>C2</i>       | 3.1525E-05           | 19.4154821                      | 12.7529945   | 12.871815    | 13.2839544   | 11.8268275   | 8.8856567   | 7.06405988 | 8.90968942 | 8.49423966 |
| <i>C4B</i>      | 0.00115237           | 2.74994817                      | 11.9378609   | 11.8222955   | 12.0389152   | 11.2266874   | 10.6056506  | 10.4326532 | 10.0473907 | 10.3506235 |
| <i>CCL3L3</i>   | 0.00998316           | 12.6461694                      | 7.68269352   | 8.8183256    | 6.2158209    | 9.71923397   | 5.57439361  | 4.05321839 | 4.08676886 | 4.07917894 |
| <i>CCL4L2</i>   | 1.04E-05             | 9.20389449                      | 11.5978762   | 11.4136519   | 10.8131877   | 11.6962735   | 8.60884781  | 7.83085352 | 7.7201318  | 8.31047391 |
| <i>CLCF1</i>    | 0.00359847           | 4.76951542                      | 10.5256428   | 9.33377368   | 9.68999182   | 8.71536535   | 7.52957563  | 7.48139774 | 6.27183349 | 7.57980456 |
| <i>COL4A4</i>   | 0.00135224           | 2.49753594                      | 12.1919058   | 11.7701501   | 11.5241023   | 11.404309    | 10.4232377  | 10.6671093 | 9.81380026 | 10.1070536 |
| <i>COPS2</i>    | 0.00792557           | 0.42881507                      | 6.0984       | 6.83378      | 6.89997      | 6.91425      | 7.85948     | 7.87683    | 7.94789    | 7.94849    |
| <i>CP</i>       | 0.00241811           | 2.99616713                      | 5.80698796   | 5.40007396   | 5.5354175    | 5.33818918   | 4.30646015  | 3.32968881 | 3.40862181 | 3.41651403 |
| <i>CXCL1</i>    | 7.4221E-05           | 86.4843126                      | 11.686237    | 11.9387947   | 11.2808279   | 9.49721553   | 5.63286437  | 4.55714306 | 2.80740022 | 5.56790843 |
| <i>CXCL2</i>    | 0.00012495           | 367.70035                       | 15.0068893   | 13.8201615   | 14.3591636   | 12.4651913   | 6.24723431  | 5.66579877 | 4.88172552 | 5.79990993 |
| <i>DARS</i>     | 0.00940061           | 0.45845435                      | 8.23719      | 7.85633      | 7.3066       | 7.83945      | 8.91135     | 8.99147    | 8.91083    | 8.92652    |
| <i>ESPN</i>     | 0.00708645           | 0.47468736                      | 8.29648602   | 8.67334039   | 7.9926883    | 8.02194845   | 8.66648573  | 9.67202348 | 9.86525274 | 8.95570941 |
| <i>FGA</i>      | 0.00437719           | 12.8132363                      | 6.48496942   | 4.67359549   | 4.70337065   | 4.20977557   | 1.61499472  | 1.11357494 | 1.5563747  | 1.72366248 |
| <i>FGF18</i>    | 0.00935827           | 2.38085221                      | 6.70328291   | 7.65333336   | 6.59544475   | 6.55731227   | 5.23970752  | 5.50275466 | 5.48558436 | 6.43298831 |
| <i>FGF7</i>     | 0.00739996           | 2.54229134                      | 12.1623671   | 12.1832116   | 12.1907437   | 9.73457246   | 11.13056005 | 10.5600605 | 11.2887263 | 10.7080172 |
| <i>FLNA</i>     | 0.00076587           | 3.75154573                      | 5.87182555   | 6.77771993   | 6.1317294    | 5.67929733   | 4.27159295  | 3.52889417 | 4.38132781 | 4.31474657 |
| <i>GC</i>       | 0.00356756           | 3.91364004                      | 9.06839617   | 8.11646476   | 8.36148645   | 8.28902234   | 5.98313374  | 6.83362903 | 6.68717464 | 4.97410561 |
| <i>HBEGF</i>    | 0.00324271           | 2.26897147                      | 10.3520749   | 10.9191353   | 10.348654    | 9.97011992   | 9.23237839  | 9.48642214 | 8.86099    | 8.79260974 |
| <i>HLA-G</i>    | 0.00590275           | 5.84427995                      | 15.3765158   | 15.9942084   | 14.4006128   | 15.9280594   | 13.0003462  | 12.8258912 | 12.9697075 | 12.9126744 |
| <i>HP</i>       | 0.00254839           | 18.2202734                      | 13.6739025   | 12.5245569   | 12.4304238   | 11.3895733   | 8.53412305  | 8.35995836 | 8.84277841 | 8.63943997 |
| <i>IL6</i>      | 0.00983112           | 3.12644152                      | 4.22410051   | 3.96498279   | 2.78549987   | 4.22104595   | 2.67494443  | 2.18442782 | 2.37533145 | 2.5371227  |
| <i>ISYNA1</i>   | 0.0065824            | 0.29141509                      | 7.88827      | 7.06827      | 6.69034      | 6.7121       | 8.94954     | 8.8417     | 8.71896    | 8.96419    |
| <i>MAP2K6</i>   | 0.00455522           | 0.45182298                      | 5.29722036   | 5.62548368   | 5.78430258   | 6.22709906   | 6.9182892   | 6.45610449 | 7.20915294 | 7.36024103 |
| <i>MAPT</i>     | 0.00537519           | 0.14144899                      | 1.57334382   | 3.73114395   | 2.97726248   | 2.96884428   | 4.24416059  | 5.75627467 | 6.46324583 | 6.07349843 |
| <i>MMP7</i>     | 0.00219659           | 4.09347148                      | 10.11606065  | 9.566944     | 9.82729182   | 8.78421324   | 7.07419672  | 7.90276921 | 7.97790813 | 7.40237476 |
| <i>MR11</i>     | 0.00431771           | 0.36765449                      | 7.33554      | 6.89236      | 6.28269      | 6.41489      | 8.06119     | 8.07761    | 8.02313    | 8.53786    |
| <i>MSLN</i>     | 0.00044209           | 0.14342752                      | 6.95196      | 6.70823      | 6.86536      | 7.003        | 7.88779     | 7.58554    | 7.91533    | 7.51336    |
| <i>NAMPT</i>    | 0.00985356           | 7.12333821                      | 10.2533392   | 10.2871112   | 10.1812931   | 8.28211893   | 7.0811292   | 7.04565179 | 6.96362138 | 6.81762452 |
| <i>NNMT</i>     | 0.00186303           | 5.45698982                      | 12.8814489   | 12.3220252   | 11.7445027   | 12.8092862   | 9.07053015  | 10.7388921 | 9.14951311 | 8.94578602 |
| <i>NRCAM</i>    | 0.00236124           | 0.42474301                      | 7.39329724   | 6.7680951    | 6.56594077   | 6.96481535   | 7.97358683  | 7.92348316 | 8.70395225 | 8.45748763 |
| <i>ORM2</i>     | 0.00511354           | 3.82826774                      | 6.1534025    | 7.19668784   | 5.70180137   | 6.04787335   | 3.89751055  | 4.20373373 | 5.67592806 | 3.3240468  |
| <i>PAEP</i>     | 0.0083141            | 0.08884643                      | 6.76843      | 6.6718       | 6.94806      | 7.02895      | 8.00595     | 8.37603    | 8.07525    | 7.16545    |
| <i>SI00A12</i>  | 0.00232373           | 3.97898962                      | 5.61203255   | 6.8488888    | 6.52976172   | 6.95575669   | 3.73285938  | 5.18151433 | 4.16213817 | 3.96630919 |
| <i>SI00A9</i>   | 0.00232373           | 3.97898962                      | 5.61203255   | 6.8488888    | 6.52976172   | 6.95575669   | 3.73285938  | 5.18151433 | 4.16213817 | 3.96630919 |
| <i>SAA4</i>     | 0.00207474           | 2.05551316                      | 6.82823229   | 6.39826723   | 6.45069781   | 6.66645349   | 6.04622935  | 5.42341013 | 4.9226849  | 5.48645828 |
| <i>SDC1</i>     | 0.0075914            | 0.48735874                      | 8.51797459   | 9.03812532   | 8.42085884   | 8.14165357   | 9.48961545  | 9.70647854 | 9.68265454 | 9.68603121 |
| <i>SOD2</i>     | 0.00078175           | 40.9562282                      | 10.5869783   | 9.65449752   | 10.1830021   | 8.28093542   | 4.88209543  | 4.87726698 | 4.11431041 | 4.61020239 |
| <i>STAT3</i>    | 0.00412708           | 3.79616973                      | 4.88209543   | 6.3085295    | 5.76673961   | 6.02454895   | 4.26066628  | 3.87347693 | 3.64686163 | 4.15932674 |
| <i>TARS</i>     | 0.00365672           | 0.49813891                      | 7.32907      | 7.52063      | 7.37836      | 7.76249      | 8.71216     | 8.84384    | 8.32002    | 8.13605    |
| <i>THBS1</i>    | 0.00088828           | 6.28157584                      | 11.2111301   | 11.2299      | 11.1459108   | 10.2206037   | 7.97178309  | 8.75060394 | 7.95239015 | 6.81845554 |
| <i>TNF</i>      | 9.40E-05             | 4.50980845                      | 8.11290726   | 8.01025217   | 8.23929127   | 7.85841769   | 5.726613    | 5.81210033 | 5.18943856 | 6.27183349 |
| <i>TP53AIP1</i> | 0.00686152           | 0.30677867                      | 2.10064498   | 2.83702332   | 2.79723572   | 3.60309849   | 4.61363812  | 4.84750613 | 4.2526069  | 4.44317103 |
| <i>VATI</i>     | 0.0098171            | 5.68035869                      | 8.30961818   | 8.04460348   | 9.78243274   | 7.36008458   | 6.6907511   | 5.14824634 | 4.38213199 | 7.15603913 |
| <i>WNT10A</i>   | 0.0083653            | 2.22373592                      | 5.95606016   | 5.38966095   | 5.24690203   | 5.14056709   | 4.95398956  | 4.29821536 | 3.30995213 | 4.4930245  |
