# Supplementary material for: Integrated analysis of mRNA and protein expression profiling in tubal endometriosis
Source: PubMed Central journal article supplement (PMC7159149; doi:10.1530/rep-19-0587), 2020-03-02
Supplement: supplementary_table_5.pdf [file supplementary_table_5.pdf]

Table S5. 52 Differentially expressed proteins LC-MS/MS information

| Protein          | FDR-adjusted p-value | Fold Change relative to control | S129922_T EM | S302873_T EM | S30589_T EM | S30863_T EM | S30353_NC  | S30504_NC  | S30622_NC  | S306515_NC |
|------------------|----------------------|---------------------------------|--------------|--------------|-------------|-------------|------------|------------|------------|------------|
| <i>AIBG</i>      | 0.00919397           | 2.08500017                      | 8.35491      | 8.77225      | 8.26081     | 8.49668     | 7.20962    | 7.28237    | 7.10442    | 8.04805    |
| <i>C2</i>        | 0.00650354           | 5.67648538                      | 12.3849129   | 12.8755425   | 11.7658302  | 11.7560978  | 10.4748677 | 9.6946809  | 8.3693694  | 10.2486865 |
| <i>CAB</i>       | 0.00893826           | 6.17940019                      | 13.6936945   | 13.5008415   | 11.9816996  | 13.1519892  | 10.6278418 | 10.9530104 | 8.90159981 | 11.3359055 |
| <i>CAPI</i>      | 0.00303174           | 2.16155568                      | 8.5369       | 8.36996      | 8.67264     | 8.25005     | 7.80634    | 7.35434    | 6.98425    | 7.23634    |
| <i>CCL3L3</i>    | 0.00998316           | 12.6461694                      | 7.68269352   | 8.8183256    | 6.2158209   | 9.71923397  | 5.57439361 | 4.05321839 | 4.08676886 | 4.07917894 |
| <i>CCLAL2</i>    | 2.8247E-05           | 9.59757923                      | 11.5978762   | 11.4136519   | 10.8131877  | 11.6962735  | 8.60884781 | 7.83085352 | 7.7201318  | 8.31047391 |
| <i>CFB</i>       | 0.00657697           | 2.8715158                       | 8.96958      | 9.6031       | 9.48866     | 8.72976     | 8.36177    | 7.19504    | 7.19659    | 7.95045    |
| <i>COL4A4</i>    | 0.00917772           | 3.63361561                      | 5.62754591   | 6.51084788   | 6.22709906  | 7.26905379  | 4.60391958 | 4.39381342 | 4.79529644 | 4.39589395 |
| <i>CP</i>        | 0.00935563           | 14.3898292                      | 11.1932322   | 11.2150262   | 10.4071762  | 10.1969153  | 8.56471752 | 6.82271859 | 4.99459335 | 7.24241011 |
| <i>CXCL1</i>     | 0.00033147           | 88.0004987                      | 11.686237    | 11.9387947   | 11.2808279  | 9.49721553  | 5.63286437 | 4.55714306 | 2.80740022 | 5.56790843 |
| <i>CXCL2</i>     | 0.00109296           | 182.14281                       | 13.1170869   | 11.6675799   | 12.5705218  | 9.91265424  | 4.59573021 | 4.50813882 | 3.78979408 | 4.33847479 |
| <i>FGA</i>       | 0.00426989           | 11.4381044                      | 6.48496942   | 4.67359549   | 4.70337065  | 4.20977557  | 1.61499472 | 1.11357494 | 1.5563747  | 1.72366248 |
| <i>FGF18</i>     | 0.00678236           | 7.37642609                      | 9.40745577   | 8.09045537   | 10.0066116  | 7.97450216  | 6.2521927  | 6.29937059 | 4.51995524 | 6.8758184  |
| <i>FGF7</i>      | 0.00719728           | 4.07959378                      | 8.1669885    | 9.25120426   | 7.95170363  | 7.90989914  | 5.86204546 | 7.31303082 | 6.43838317 | 5.55260405 |
| <i>FLNA</i>      | 0.0059687            | 2.03296095                      | 9.35904      | 8.98349      | 9.80796     | 9.48234     | 8.11916    | 8.56651    | 8.05801    | 8.79482    |
| <i>GC</i>        | 0.00691915           | 2.21040388                      | 9.49575      | 9.3104       | 9.4952      | 9.38353     | 8.70409    | 8.13389    | 7.83722    | 8.43244    |
| <i>HBEGF</i>     | 0.00965723           | 8.03520809                      | 7.58747243   | 9.9198342    | 7.11137599  | 7.72502486  | 4.46243916 | 4.14034076 | 5.90867507 | 5.80691093 |
| <i>HLA-G</i>     | 0.00684797           | 3.68482898                      | 4.65550296   | 5.16588265   | 4.13824587  | 5.62298916  | 2.28729844 | 2.97688897 | 2.87198193 | 3.92006064 |
| <i>HNRNPA2B1</i> | 0.00410908           | 2.29691107                      | 8.92844      | 8.7361       | 8.13194     | 8.55368     | 7.38487    | 7.89832    | 6.91771    | 7.35048    |
| <i>HP</i>        | 0.00713682           | 27.8694942                      | 10.2932421   | 13.984608    | 10.3499983  | 10.5634241  | 5.83501107 | 7.69076654 | 5.97456573 | 6.48846961 |
| <i>IGLL5</i>     | 0.00972356           | 2.50319815                      | 7.99706      | 8.49766      | 8.6621      | 8.74108     | 6.9191     | 7.65546    | 6.47783    | 7.55042    |
| <i>IL6</i>       | 0.00984178           | 34.8412574                      | 8.83791594   | 10.7190878   | 7.39390701  | 6.7230179   | 3.29478822 | 3.08326203 | 3.28962751 | 3.51535178 |
| <i>MMP7</i>      | 0.00683678           | 24.6851116                      | 14.6532148   | 13.4611436   | 14.4773461  | 14.2893683  | 11.0387557 | 10.9035261 | 8.16733193 | 8.27002362 |
| <i>ORM2</i>      | 0.00281776           | 2.00264611                      | 7.31983      | 8.07181      | 7.61927     | 7.75035     | 6.90696    | 6.73939    | 6.78884    | 6.31844    |
| <i>S100A9</i>    | 0.00443157           | 39.0022379                      | 13.7652      | 10.66654     | 10.2903     | 10.71072    | 6.85066    | 5.98613    | 5.50969    | 5.94434    |
| <i>SAA2-SAA4</i> | 0.00710095           | 2.42775023                      | 8.87347      | 8.61639      | 8.74221     | 8.45327     | 8.04012    | 7.34914    | 6.96846    | 7.20914    |
| <i>SAA4</i>      | 0.00710026           | 29.2879385                      | 7.79207308   | 10.3626942   | 7.78827895  | 5.92866558  | 3.56738411 | 2.42608036 | 1.34716625 | 5.04214207 |
| <i>SERPINA1</i>  | 0.00566953           | 2.63430976                      | 10.2167      | 10.5686      | 10.3469     | 9.39952     | 8.33298    | 8.97547    | 8.69073    | 8.94284    |
| <i>SNCA</i>      | 0.00622196           | 3.86522527                      | 8.20672      | 8.68673      | 8.55149     | 7.25853     | 6.08695    | 6.25188    | 6.06344    | 6.49899    |
| <i>TNF</i>       | 0.00081308           | 4.94243076                      | 8.11290726   | 8.01025217   | 8.23929127  | 7.85841769  | 5.726613   | 5.81210033 | 5.18943856 | 6.27183348 |
| <i>VATI</i>      | 0.00630013           | 2.15137646                      | 8.57586      | 8.41601      | 8.21611     | 7.82974     | 7.77279    | 6.96091    | 6.92761    | 6.95537    |
| <i>VCL</i>       | 0.00060262           | 2.42762823                      | 9.15512      | 9.22766      | 8.81525     | 8.85022     | 7.64926    | 7.92927    | 7.99621    | 7.35532    |
| <i>WNT10A</i>    | 0.00699026           | 2.97588237                      | 7.91250125   | 6.46386442   | 7.13158659  | 7.44988231  | 5.78503786 | 5.03556404 | 5.90988501 | 5.93407767 |
| <i>AGL</i>       | 0.00307397           | 0.37586005                      | 7.5548       | 7.18304      | 6.9997      | 7.40161     | 8.06352    | 8.99702    | 8.72881    | 8.99673    |
| <i>AHSG</i>      | 0.00326809           | 0.34208826                      | 5.31895219   | 4.77507753   | 5.79579407  | 5.17588432  | 6.66301857 | 6.96121131 | 6.87621894 | 6.75549738 |
| <i>ANXA2</i>     | 0.00987526           | 0.44494842                      | 8.19742      | 7.55716      | 8.13764     | 8.73795     | 8.91446    | 9.5387     | 9.11079    | 9.73938    |
| <i>EZR</i>       | 0.00603152           | 0.3822491                       | 8.69011      | 8.44105      | 8.00612     | 7.6835      | 9.54301    | 9.55495    | 9.48841    | 9.78407    |
| <i>HSPB1</i>     | 0.00265115           | 0.49461744                      | 8.55706      | 8.83749      | 8.09065     | 8.38653     | 9.45242    | 9.43111    | 9.22032    | 9.83034    |
| <i>HSPH1</i>     | 0.00843181           | 0.33303253                      | 7.68508      | 7.567        | 7.19449     | 7.64226     | 9.40848    | 8.24561    | 9.20344    | 9.57636    |
| <i>MAP2K6</i>    | 0.00404865           | 0.41974339                      | 5.29722036   | 5.62548368   | 5.78430258  | 6.22709906  | 6.9182892  | 6.45610449 | 7.20915294 | 7.36024103 |
| <i>MAPT</i>      | 0.00537519           | 0.14144899                      | 1.57334382   | 3.73114395   | 2.97726248  | 2.96884428  | 4.24416059 | 5.75627467 | 6.46324583 | 6.07349843 |
| <i>MRII</i>      | 0.00431771           | 0.36765449                      | 7.33554      | 6.89236      | 6.28269     | 6.41489     | 8.06119    | 8.07761    | 8.02313    | 8.53786    |
| <i>NRCAM</i>     | 0.00209036           | 0.39458545                      | 7.39329724   | 6.7680951    | 6.56594077  | 6.96481535  | 7.97358683 | 7.92348316 | 8.70395225 | 8.45748763 |
| <i>PAEP</i>      | 2.7937E-05           | 0.40574353                      | 6.76843      | 6.6718       | 6.94806     | 7.02895     | 8.00595    | 8.37603    | 8.07525    | 8.16545    |
| <i>PEKP</i>      | 0.00476322           | 0.42072079                      | 7.16501      | 7.46636      | 7.45154     | 7.2944      | 8.98778    | 8.76525    | 8.55496    | 8.06558    |
| <i>PSMA7</i>     | 0.00983617           | 0.29412677                      | 7.53232      | 7.40851      | 6.77034     | 7.53747     | 9.1614     | 8.18367    | 9.95962    | 9.00591    |
| <i>S100A11</i>   | 1.0391E-05           | 0.33344541                      | 8.03599      | 7.74406      | 7.79628     | 8.02346     | 9.22686    | 9.59344    | 9.57356    | 9.54384    |
| <i>SDCI</i>      | 0.00720338           | 0.46279916                      | 8.51797459   | 9.03812532   | 8.42085884  | 8.14165357  | 9.48961545 | 9.70647854 | 9.68265454 | 9.68603121 |
| <i>SHMT1</i>     | 0.00026804           | 0.3466526                       | 7.42339      | 7.1543       | 7.20585     | 7.31725     | 8.4334     | 8.87157    | 8.99409    | 8.91548    |
| <i>TP53AIP1</i>  | 0.00686152           | 0.30677867                      | 2.10064498   | 2.83702332   | 2.79723572  | 3.60309849  | 4.61363812 | 4.84750613 | 4.2526069  | 4.44317103 |
| <i>UGDH</i>      | 0.00334336           | 0.29241262                      | 8.46875      | 7.33983      | 7.24509     | 7.52648     | 9.61463    | 9.35626    | 9.01899    | 9.68596    |
| <i>MSLN</i>      | 0.00044209           | 0.14342752                      | 6.95196      | 6.70823      | 6.86536     | 7.003       | 7.88779    | 7.58554    | 7.91533    | 7.51336    |
