# Supplementary material for: Integrated analysis of mRNA and protein expression profiling in tubal endometriosis
Source: PubMed Central journal article supplement (PMC7159149; doi:10.1530/rep-19-0587), 2020-03-02
Supplement: supplementary_table_6.pdf [file supplementary_table_6.pdf]

Table S6. Details for the annotation used for protein identifiers.

| Protein IDs                                                                                                                                                                                              | Protein names                                                                             | Gene names                       | Fasta headers                                                                                                                                                                                                                                                                                                                                                                                                                                                                 |
|----------------------------------------------------------------------------------------------------------------------------------------------------------------------------------------------------------|-------------------------------------------------------------------------------------------|----------------------------------|-------------------------------------------------------------------------------------------------------------------------------------------------------------------------------------------------------------------------------------------------------------------------------------------------------------------------------------------------------------------------------------------------------------------------------------------------------------------------------|
| P04217; P04217-2; M0R009; CON-Q2KJF1                                                                                                                                                                     | Alpha-1B-glycoprotein                                                                     | <i>A1BG</i>                      | Alpha-1B-glycoprotein; Isoform 2 of Alpha-1B-glycoprotein; Alpha-1B-glycoprotein (Fragment)                                                                                                                                                                                                                                                                                                                                                                                   |
| P35573; P35573-2; P35573-3                                                                                                                                                                               | Glycogen debranching enzyme; 4-alpha-glucanotransferase; Amylo-alpha-1,6-glucosidase      | <i>AGL</i>                       | Glycogen debranching enzyme; Isoform 5 of Glycogen debranching enzyme; Isoform 6 of Glycogen debranching enzyme                                                                                                                                                                                                                                                                                                                                                               |
| P02765; C9JV77                                                                                                                                                                                           | Alpha-2-HS-glycoprotein; Alpha-2-HS-glycoprotein chain A; Alpha-2-HS-glycoprotein chain B | <i>AHSG</i>                      | Alpha-2-HS-glycoprotein; Alpha-2-HS-glycoprotein                                                                                                                                                                                                                                                                                                                                                                                                                              |
| P07355; H0YN42; P07355-2; H0YMD0; H0YMU9; H0YMM1; H0YKS4; A6NMY6; H0YKZ7; H0YLV6; H0YMT9; H0YKX9; H0YKL9; H0YMW4; H0YKV8; H0YMS0; H0YMD9; H0YNP5; H0YNB8; H0YKN4; H0YN28; H0YL33; H0YNA0; H0YLE2; H0YNS2 | Annexin A2; Annexin; Putative annexin A2-like protein                                     | <i>ANXA2</i> ;<br><i>ANXA2P2</i> | Annexin A2; Annexin (Fragment); Isoform 2 of Annexin A2; Annexin (Fragment); Annexin; Annexin (Fragment); Annexin (Fragment); Putative annexin A2-like protein; Annexin (Fragment); Annexin; Annexin (Fragment); Annexin (Fragment); Annexin (Fragment); Annexin (Fragment); Complement C2; Complement C2; Complement C2; Isoform 3 of Complement C2; Complement C2; Complement C2 (Fragment); Isoform 2 of Complement C2; Complement C2 (Fragment); Complement C2 (Fragment) |
| P06681; B4DQI1; A0A0G2JL69; P06681-3; A0A0G2JIE7; H0Y3H6; P06681-2; E9PDZ0; A0A0G2JK28; H0Y868                                                                                                           | Complement C2; Complement C2b fragment; Complement C2a fragment                           | <i>C2</i>                        | Complement C2; Complement C2 (Fragment); Isoform 2 of Complement C2; Complement C2 (Fragment); Complement C2 (Fragment)                                                                                                                                                                                                                                                                                                                                                       |
| A0A140TA29; A0A0G2JL54; F5GXSO                                                                                                                                                                           | Complement C4-B                                                                           | <i>C4B</i>                       | Complement C4-B; Complement C4-B; Isoform 2 of Adenylyl cyclase-associated protein 1; Adenylyl cyclase-associated protein 1; Adenylyl cyclase-associated protein (Fragment); Adenylyl cyclase-associated protein (Fragment); Adenylyl cyclase-associated protein (Fragment); Adenylyl cyclase-associate                                                                                                                                                                       |
| Q01518-2; Q01518; Q5TOR7; Q5TOR6; Q5TOR5; Q5TOR4; Q5TOR3; Q5TOR2; Q5TOR1; Q5TOR9; Q5TOR8; Q5TOS3                                                                                                         | Adenylyl cyclase-associated protein 1; Adenylyl cyclase-associated protein                | <i>CAP1</i>                      | C-C Motif Chemokine Ligand 4 Like 2                                                                                                                                                                                                                                                                                                                                                                                                                                           |
| Q8NHW4                                                                                                                                                                                                   | C-C Motif Chemokine Ligand 4 Like 2                                                       | <i>CCL4L2</i>                    | C-C Motif Chemokine Ligand 3 Like 3                                                                                                                                                                                                                                                                                                                                                                                                                                           |
| P16619                                                                                                                                                                                                   | C-C Motif Chemokine Ligand 3 Like 3                                                       | <i>CCL3L3</i>                    |                                                                                                                                                                                                                                                                                                                                                                                                                                                                               |
| B4E1Z4; E7ETN3; P00751; A0A0G2JH38; H7C5H1; P00751-2; C9JRT3; A0A0G2JHM4; A0A0G2JJ82; H7C526; F8WCJ9; A0A0G2JJM0; Q5ST52; F2Z3N2; Q8N6L6                                                                 | Complement factor B; Complement factor B Ba fragment; Complement factor B Bb fragment     | <i>CFB</i>                       | Uncharacterized protein; Uncharacterized protein; Complement factor B                                                                                                                                                                                                                                                                                                                                                                                                         |
| P53420                                                                                                                                                                                                   | Collagen Type IV Alpha 4 Chain                                                            | <i>COL4A4</i>                    | Collagen Type IV Alpha 4 Chain                                                                                                                                                                                                                                                                                                                                                                                                                                                |
| P00450; E9PFZ2; H7C5R1; CON__ENSEMBL:ENSBTAP0000031900; D6RE86; H7C5N5                                                                                                                                   | Ceruloplasmin                                                                             | <i>CP</i>                        | Ceruloplasmin; Ceruloplasmin; Ceruloplasmin (Fragment)                                                                                                                                                                                                                                                                                                                                                                                                                        |
| P09341                                                                                                                                                                                                   | Growth-regulated alpha protein                                                            | <i>CXCL1</i>                     | Growth-regulated alpha protein                                                                                                                                                                                                                                                                                                                                                                                                                                                |
| P19875                                                                                                                                                                                                   | C-X-C motif chemokine 2                                                                   | <i>CXCL2</i>                     | C-X-C motif chemokine 2                                                                                                                                                                                                                                                                                                                                                                                                                                                       |
| E7EQR4; P15311; E9PQ82                                                                                                                                                                                   | Ezrin                                                                                     | <i>EZR</i>                       | Ezrin; Ezrin                                                                                                                                                                                                                                                                                                                                                                                                                                                                  |
| P02671-2; P02671; A0A087WUA0                                                                                                                                                                             | Fibrinogen alpha chain;                                                                   | <i>FGA</i>                       | Isoform 2 of Fibrinogen alpha chain; Fibrinogen alpha chain                                                                                                                                                                                                                                                                                                                                                                                                                   |
| O76093                                                                                                                                                                                                   | Fibrinopeptide A; Fibrinogen alpha chain                                                  | <i>FGF18</i>                     | Fibroblast growth factor 18                                                                                                                                                                                                                                                                                                                                                                                                                                                   |
| P21781                                                                                                                                                                                                   | Fibroblast growth factor 18                                                               | <i>FGF7</i>                      | Fibroblast growth factor 7                                                                                                                                                                                                                                                                                                                                                                                                                                                    |
| P21333-2; P21333; Q5HY54;                                                                                                                                                                                | Fibroblast growth factor 7                                                                | <i>FLNA</i>                      | Isoform 2 of Filamin-A; Filamin-A;                                                                                                                                                                                                                                                                                                                                                                                                                                            |
|                                                                                                                                                                                                          | Filamin-A                                                                                 |                                  |                                                                                                                                                                                                                                                                                                                                                                                                                                                                               |

|                                                                                                                                                                          |                                                                                                                                                  |                                            |                                                                                                                                                                                                                                                                                                                                                                                                                               |
|--------------------------------------------------------------------------------------------------------------------------------------------------------------------------|--------------------------------------------------------------------------------------------------------------------------------------------------|--------------------------------------------|-------------------------------------------------------------------------------------------------------------------------------------------------------------------------------------------------------------------------------------------------------------------------------------------------------------------------------------------------------------------------------------------------------------------------------|
| Q60FE5; A0A087WWY3;<br>F8WE98; H0Y5F3; H0Y5C6;<br>H7C2E7<br>D6RF35; P02774; P02774-3 ;<br>P02774-2; D6RBJ7; D6RF20;<br>CON_Q3MHN5;<br>CON_ENSEMBL:ENSBTAP00<br>000018229 | Filamin-A; Filamin A; Filamin-A                                                                                                                  |                                            |                                                                                                                                                                                                                                                                                                                                                                                                                               |
| Q99075                                                                                                                                                                   | Vitamin D-binding protein<br>Proheparin-binding EGF-like growth<br>factor                                                                        | <i>GC</i><br><i>HBEGF</i>                  | Vitamin D-binding protein; Vitamin<br>D-binding protein; Isoform 3 of<br>Vitamin D-binding protein; I soform<br>2 of Vitamin D-binding protein<br>Proheparin-binding EGF-like growth<br>factor                                                                                                                                                                                                                                |
| P17693                                                                                                                                                                   | HLA class I histocompatibility<br>antigen, alpha chain G                                                                                         | <i>HLA-G</i>                               | HLA class I histocompatibility<br>antigen, alpha chain G<br>Heterogeneous nuclear<br>ribonucleoproteins A2/B1; Isoform<br>A2 of Heterogeneous nuclear<br>ribonucleoproteins A2/B1;                                                                                                                                                                                                                                            |
| P22626; P22626-2;<br>A0A087WUI2                                                                                                                                          | Heterogeneous nuclear<br>ribonucleoproteins A2/B1                                                                                                | <i>HNRNPA2B1</i>                           | Heterogeneous nuclear<br>ribonucleoproteins A2/B1<br>Haptoglobin; Haptoglobin;<br>Haptoglobin (Fragment);<br>Haptoglobin; Isoform 2 of<br>Haptoglobin; Haptoglobin<br>(Fragment);<br>Haptoglobin;Haptoglobin<br>(Fragment)                                                                                                                                                                                                    |
| P00738; A0A0C4DGL8;<br>J3QR68; H0Y300; P00738-2;<br>J3QLC9; A0A087WU08;<br>H3BS21; J3KRH2; J3KTC3;<br>J3KSV1; J3QQI8; H3BMJ7                                             | Haptoglobin; Haptoglobin alpha<br>chain; Haptoglobin beta chain                                                                                  | <i>HP</i>                                  | Heat shock protein beta-1; Heat<br>shock protein beta-1<br>Isoform Beta of Heat shock protein<br>105 kDa; Isoform 3 of Heat shock<br>protein 105 kDa; Heat shock protein<br>105 kDa; Isoform 4 of Heat shock<br>protein 105 kDa; Heat shock protein<br>105 kDa                                                                                                                                                                |
| P04792; F8WE04; C9J3N8                                                                                                                                                   | Heat shock protein beta-1                                                                                                                        | <i>HSPB1</i>                               | Heat shock protein beta-1; Heat<br>shock protein beta-1<br>Isoform Beta of Heat shock protein<br>105 kDa; Isoform 3 of Heat shock<br>protein 105 kDa; Heat shock protein<br>105 kDa; Isoform 4 of Heat shock<br>protein 105 kDa; Heat shock protein<br>105 kDa                                                                                                                                                                |
| Q92598-2; Q92598-3; Q92598;<br>Q92598-4; A0A0A0MSM0;<br>R4GN69; Q5TBM3                                                                                                   | Heat shock protein 105 kDa                                                                                                                       | <i>HSPH1</i>                               | Immunoglobulin lambda-like<br>polypeptide 5; Immunoglobulin<br>lambda-like polypeptide 5; Ig<br>lambda-1 chain C regions<br>(Fragment); Ig lambda-1 chain C<br>regions                                                                                                                                                                                                                                                        |
| A0A0B4J231; B9A064;<br>A0A075B6K8; P0CG04                                                                                                                                | Immunoglobulin lambda-like<br>polypeptide 5; Ig lambda-1 chain C<br>regions                                                                      | <i>IGLL5; IGLC1</i>                        | Immunoglobulin lambda-like<br>polypeptide 5; Immunoglobulin<br>lambda-like polypeptide 5; Ig<br>lambda-1 chain C regions<br>(Fragment); Ig lambda-1 chain C<br>regions                                                                                                                                                                                                                                                        |
| P05231                                                                                                                                                                   | Interleukin-6                                                                                                                                    | <i>IL6</i>                                 | Interleukin-6                                                                                                                                                                                                                                                                                                                                                                                                                 |
| P52564<br>P09237                                                                                                                                                         | Mitogen-Activated Protein Kinase<br>Kinase 6<br>Matrix Metalloproteinase 7                                                                       | <i>MAP2K6</i><br><i>MMP7</i>               | Mitogen-Activated Protein Kinase<br>Kinase 6<br>Matrix Metalloproteinase 7                                                                                                                                                                                                                                                                                                                                                    |
| P10636                                                                                                                                                                   | Microtubule-associated protein tau                                                                                                               | <i>MAPT</i>                                | Macrophage migration inhibitory<br>factor                                                                                                                                                                                                                                                                                                                                                                                     |
| Q9BV20-2; Q9BV20                                                                                                                                                         | Methylthioribose-1-phosphate<br>isomerase                                                                                                        | <i>MRII</i>                                | Isoform 2 of Methylthioribose-1-<br>phosphate isomerase;<br>Methylthioribose-1-phosphate<br>isomerase                                                                                                                                                                                                                                                                                                                         |
| H3BMA1; H3BUX1; Q13421-4;<br>Q13421-3; Q13421-2; Q13421;<br>H3BR90<br>Q92823<br>P19652                                                                                   | Mesothelin; Megakaryocyte-<br>potentiating factor; Mesothelin,<br>cleaved form<br>Neuronal cell adhesion molecule<br>Alpha-1-acid glycoprotein 2 | <i>MSLN</i><br><i>NRCAM</i><br><i>ORM2</i> | Mesothelin (Fragment); Mesothelin<br>(Fragment); Isoform 4 of<br>Mesothelin; Isoform 2 of<br>Mesothelin; Isoform 3 of<br>Mesothelin; Mesothelin<br>Neuronal cell adhesion molecule<br>Alpha-1-acid glycoprotein 2<br>Glycodelin (Fragment); Glycodelin<br>(Fragment); Glycodelin (Fragment);<br>Glycodelin; Isoform 2 of Glycodelin;<br>Glycodelin; Isoform 3 of Glycodelin                                                   |
| H0Y6A4; H0Y4U4; Q5T6T6;<br>A6XNE0; P09466-2; P09466;<br>P09466-3; H0Y530; F2Z349                                                                                         | Glycodelin                                                                                                                                       | <i>PAEP</i>                                | ATP-dependent 6-<br>phosphofructokinase, platelet type;<br>Isoform 2 of ATP-dependent 6-<br>phosphofructokinase, platelet type<br>Proteasome subunit alpha type-7;I<br>soform 2 of Proteasome subunit<br>alpha type-7; Proteasome subunit<br>alpha type-7 (Fragment); Isoform 2<br>of Proteasome subunit alpha type-7-<br>like; Isoform 3 of Proteasome subunit<br>alpha type-7-like; Proteasome<br>subunit alpha type-7-like |
| Q01813; Q01813-2; Q5VSR5;<br>B1APP6; H0Y3Y3; B1APP8;<br>H0Y757; V9GYV7; V9GY25                                                                                           | ATP-dependent 6-<br>phosphofructokinase, platelet type                                                                                           | <i>PFKP</i>                                | ATP-dependent 6-<br>phosphofructokinase, platelet type<br>Proteasome subunit alpha type-7;I<br>soform 2 of Proteasome subunit<br>alpha type-7; Proteasome subunit<br>alpha type-7 (Fragment); Isoform 2<br>of Proteasome subunit alpha type-7-<br>like; Isoform 3 of Proteasome subunit<br>alpha type-7-like; Proteasome<br>subunit alpha type-7-like                                                                         |
| O14818; O14818-2; H0Y586;<br>Q8TAA3-2; Q8TAA3-5;<br>Q8TAA3; F5GY34;<br>A0A087WYS6; O14818-4                                                                              | Proteasome subunit alpha type-7;<br>Proteasome subunit alpha type-7-like<br>Protein S100-A11; Protein S100-A11,<br>N-terminally processed        | <i>PSMA7</i><br><i>S100A11</i>             | Protein S100-A11                                                                                                                                                                                                                                                                                                                                                                                                              |
| P31949<br>P06702                                                                                                                                                         | Protein S100-A9                                                                                                                                  | <i>S100A9</i>                              | Protein S100-A9                                                                                                                                                                                                                                                                                                                                                                                                               |

|                                                                                                                                                                    |                                                                                                                            |                                                                     |                                                                                                                                                                                                                                                                                                                                                                                                                                                                                                                                                                                                                                                                                                                                                                                                                                                                                                                                                                                                                                                                                                                   |
|--------------------------------------------------------------------------------------------------------------------------------------------------------------------|----------------------------------------------------------------------------------------------------------------------------|---------------------------------------------------------------------|-------------------------------------------------------------------------------------------------------------------------------------------------------------------------------------------------------------------------------------------------------------------------------------------------------------------------------------------------------------------------------------------------------------------------------------------------------------------------------------------------------------------------------------------------------------------------------------------------------------------------------------------------------------------------------------------------------------------------------------------------------------------------------------------------------------------------------------------------------------------------------------------------------------------------------------------------------------------------------------------------------------------------------------------------------------------------------------------------------------------|
| A0A096LPE2; P35542<br>P35542<br>P01009; A0A024R6I7;P01009-<br>2;A0A0G2JRN3;P01009-<br>3;G3V2B9;G3V544;G3V5R8;G3<br>V387;A0A0B4J278;A0A0G2JPK<br>4;P20848<br>P18827 | Serum amyloid A-4 protein<br>Serum amyloid A-4 protein<br><br>Alpha-1-antitrypsin; Short peptide<br>from AAT<br>Syndecan-1 | <i>SAA2-<br/>SAA4;SAA4<br/>SAA4</i><br><br><i>SERPINA1<br/>SDC1</i> | Protein SAA2-SAA4; Serum<br>amyloid A-4 protein<br>Serum amyloid A-4 protein<br><br>Alpha-1-antitrypsin; Alpha-1-<br>antitrypsin; Isoform 2 of Alpha-1-<br>antitrypsin; Alpha-1-antitrypsin;<br>Isoform 3 of Alpha-1-antitrypsin<br>Syndecan-1<br>Isoform 4 of Serine<br>hydroxymethyltransferase, cytosolic;<br>Isoform 2 of Serine<br>hydroxymethyltransferase, cytosolic;<br>Serine hydroxymethyltransferase,<br>cytosolic; Isoform 3 of Serine<br>hydroxymethyltransferase, cytosolic<br>Alpha-synuclein; Isoform 2-4 of<br>Alpha-synuclein; Alpha-synuclein;<br>Alpha-synuclein; Isoform 2-5 of<br>Alpha-synuclein<br>Tumor necrosis factor<br>p53-regulated apoptosis-inducing<br>protein 1<br>UDP-glucose 6-dehydrogenase;<br>Isoform 2 of UDP-glucose 6-<br>dehydrogenase; Isoform 3 of UDP-<br>glucose 6-dehydrogenase<br>Synaptic vesicle membrane protein<br>VAT-1 homolog; Isoform 3 of<br>Synaptic vesicle membrane protein<br>VAT-1 homolog; Isoform 2 of<br>Synaptic vesicle membrane protein<br>VAT-1 homolog<br>Isoform 1 of Vinculin; Vinculin;<br>Vinculin (Fragment)<br>Wnt Family Member 10A |
| P34896-4; P34896-2;P34896;<br>P34896-3;G3V2D2; G3V540;<br>G3V5L0; G3V2Y4; G3V4W5;<br>P34897-3; P34897-2; P34897                                                    | Serine hydroxymethyltransferase,<br>cytosolic                                                                              | <i>SHMT1</i>                                                        |                                                                                                                                                                                                                                                                                                                                                                                                                                                                                                                                                                                                                                                                                                                                                                                                                                                                                                                                                                                                                                                                                                                   |
| E7EPV7; P37840-2; P37840;<br>H6UYS7; P37840-3; D6RA31<br>P01375<br><br>Q9HCN2                                                                                      | Alpha-synuclein<br>Tumor necrosis factor<br>p53-regulated apoptosis-inducing<br>protein 1                                  | <i>SNCA<br/>TNF<br/>TP53AIP1</i>                                    |                                                                                                                                                                                                                                                                                                                                                                                                                                                                                                                                                                                                                                                                                                                                                                                                                                                                                                                                                                                                                                                                                                                   |
| O60701; O60701-2;O60701-3;<br>E7ER95; E7ER83; E7ETF4;<br>E7EV97; D6RHF4; E9PBD2                                                                                    | UDP-glucose 6-dehydrogenase                                                                                                | <i>UGDH</i>                                                         |                                                                                                                                                                                                                                                                                                                                                                                                                                                                                                                                                                                                                                                                                                                                                                                                                                                                                                                                                                                                                                                                                                                   |
| Q99536; Q99536-3; Q99536-2;<br>K7ESA3; K7ERT7; K7EJM4;<br>K7ENX2; K7EM19; K7ER81<br>P18206-2; P18206; Q5JQ13;<br>P18206-3<br>Q9GZT5                                | Synaptic vesicle membrane protein<br>VAT-1 homolog<br><br>Vinculin<br>Wnt Family Member 10A                                | <i>VAT1<br/>VCL<br/>WNT10A</i>                                      |                                                                                                                                                                                                                                                                                                                                                                                                                                                                                                                                                                                                                                                                                                                                                                                                                                                                                                                                                                                                                                                                                                                   |
